# Supplementary material for: Aceclofenac/Citronellol Oil Nanoemulsion Repurposing Study: Formulation, In Vitro Characterization, and In Silico Evaluation of Their Antiproliferative and Pro-Apoptotic Activity against Melanoma Cell Line
Source: MDPI journal article supplement (doi:10.3390/biomedicines11092531), 2023-09-14
Supplement: s1 [file s1]

# **Aceclofenac/Citronellol Oil Nanoemulsion Repurposing study: Formulation, In-Vitro Characterization, and In-Silico Evaluation of their Antiproliferative and Pro-apoptotic Activity against Melanoma Cell Line**

## **Supplementary Figures:**

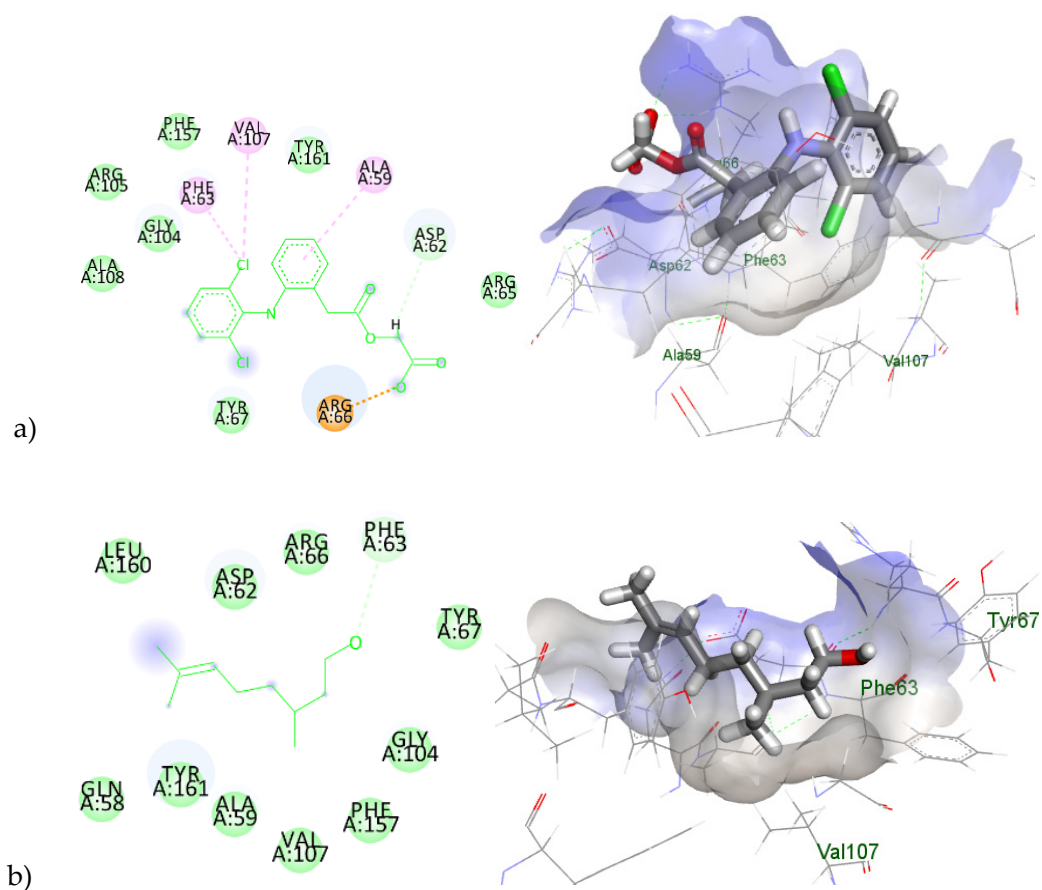

**Figure S1.** 2D and 3D Diagrams of Aceclofenac and Citronellol with Their Docking Scores in Bcl2 Binding Site; a) ACF= -5.08; b) Citronellol= -4.53 Kcal/mol.

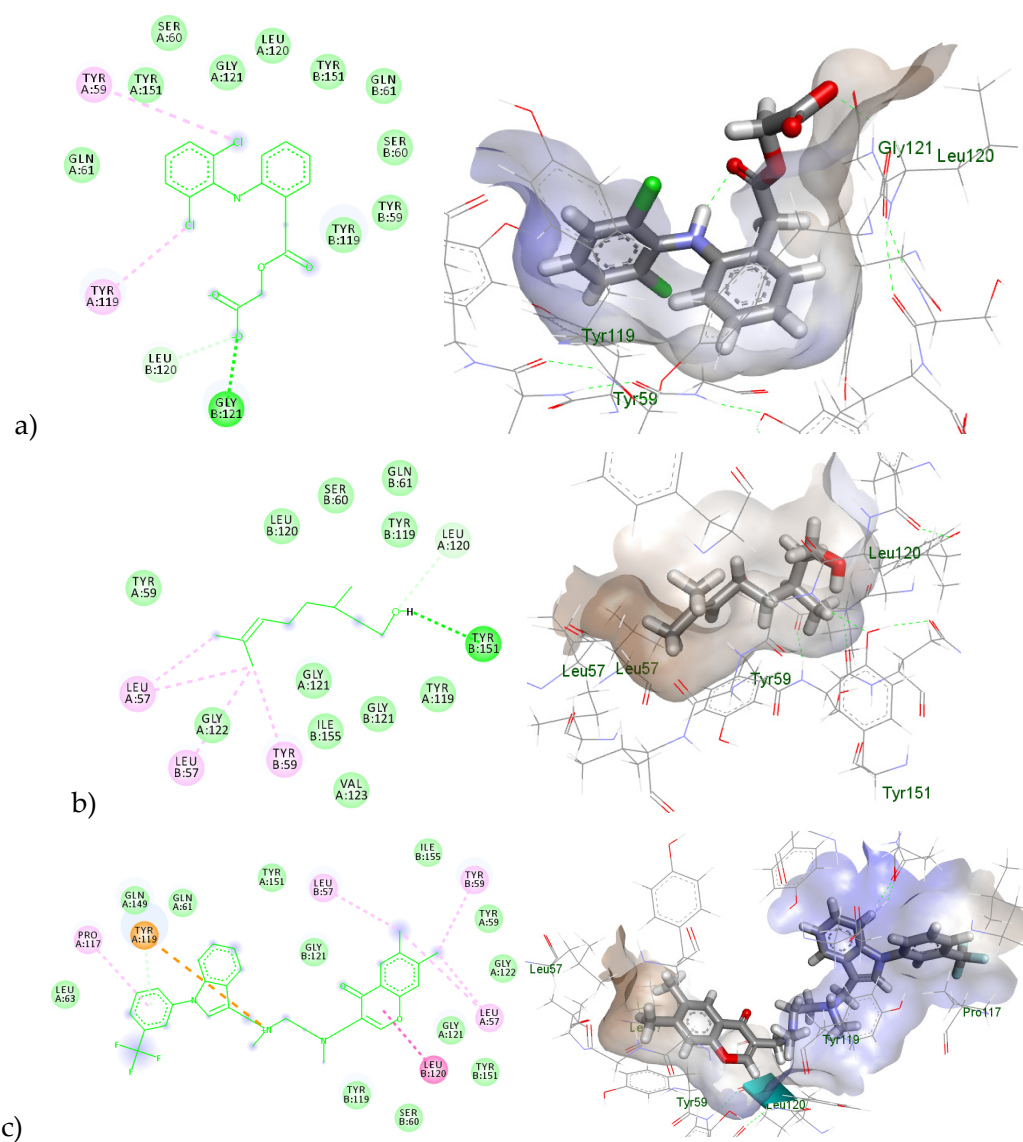

**Figure S2.** 2D and 3D Diagrams of Aceclofenac, Citronellol, And Co-crystallized Ligand 307 With Their Docking Scores; a) ACF= -5.97; b) Citronellol= -4.52; c) 307= -6.61 Kcal/mol.

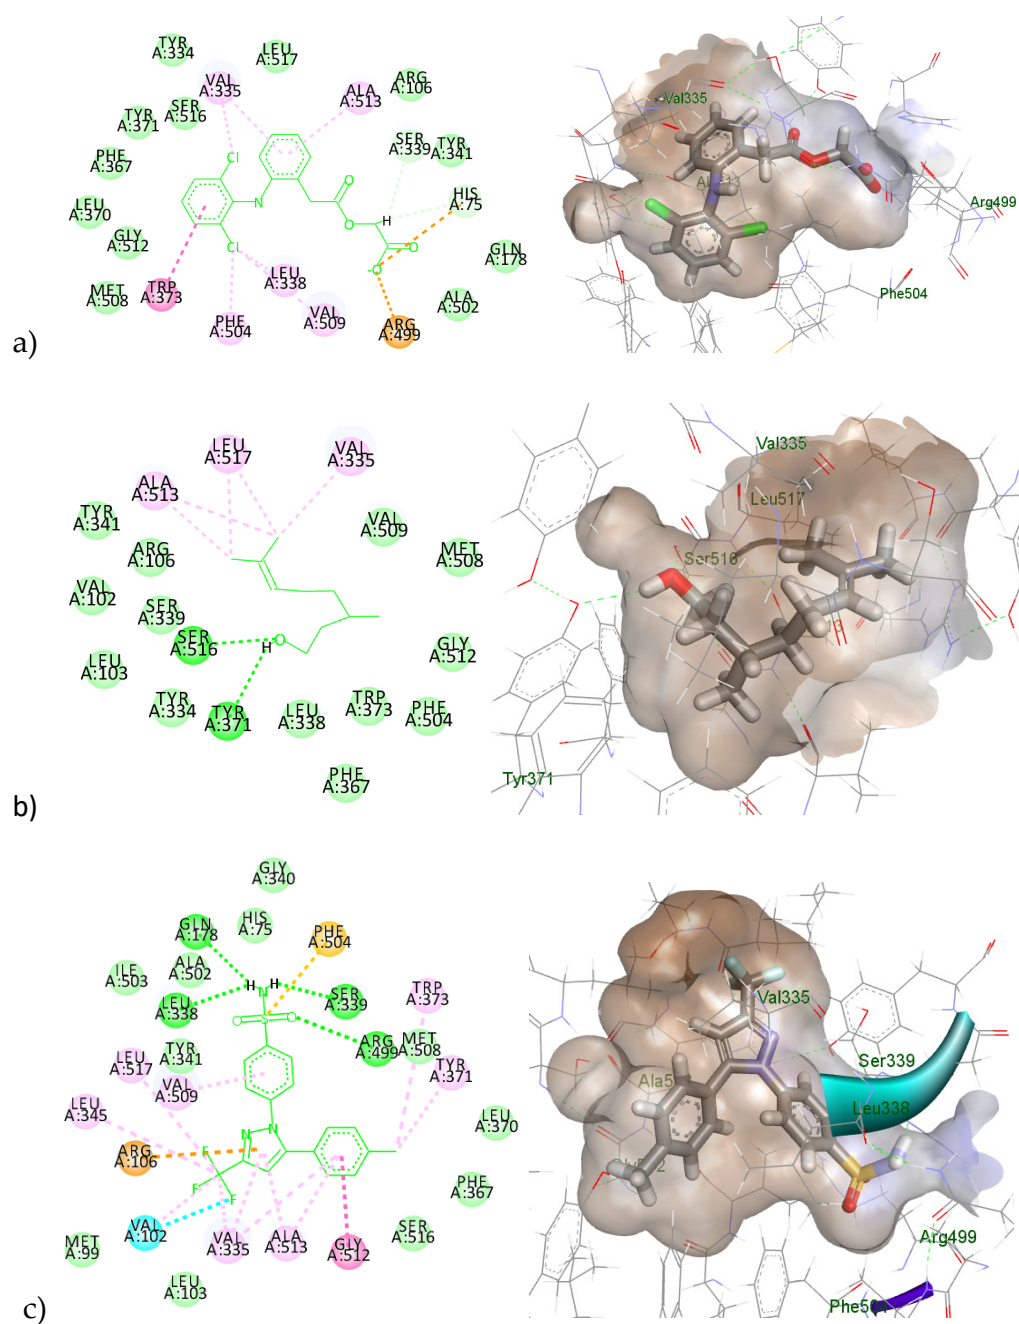

**Figure S3.** 2D and 3D diagrams of compounds under investigation Vs celecoxib with their docking scores; a) ACF= -8.16; b) Citronellol= -5.89; c) Celecoxib= -9.95 Kcal/mol.
